# Supplementary material
Source: PubMed Central journal article supplement (PMC4135940)
Supplement: JVI.01032-14_zjv999099280so2.pdf [file JVI.01032-14_zjv999099280so2.pdf]

**A**

| CHIKV LR2006-OPY1 | A | G | A | C | G | 8,716 | 8,718 | 8,720 | A | C | A | G | C |   |
|-------------------|---|---|---|---|---|-------|-------|-------|---|---|---|---|---|---|
| 25828 #1          | A | G | A | C | G | G     | A     | U     | G | A | C | A | G | C |
| 25828 #2          | A | A | G | A | C | G     | A     | U     | G | A | C | A | G | C |
| 25828 #3          | A | A | G | A | C | G     | A     | U     | G | A | C | A | G | C |
| 25828 #4          | A | A | G | A | C | G     | A     | U     | G | A | C | A | G | C |
| 25828 #5          | A | A | G | A | C | G     | A     | U     | G | A | C | A | G | C |
| 26638 #1          | A | A | G | A | C | G     | A     | U     | G | A | C | A | G | C |
| 26638 #2          | A | A | G | A | C | G     | A     | U     | G | A | C | A | G | C |
| 26638 #3          | A | A | G | A | C | G     | A     | U     | G | A | C | A | G | C |
| 26638 #4          | A | A | G | A | C | G     | A     | U     | G | A | C | A | G | C |
| 26638 #5          | A | A | G | A | C | G     | A     | U     | G | A | C | A | G | C |
| 29858 #1          | A | A | G | A | C | G     | A     | U     | G | A | C | A | G | C |
| 29858 #2          | A | A | G | A | C | G     | A     | U     | G | A | C | A | G | C |
| 29858 #3          | A | A | G | A | C | G     | A     | U     | G | A | C | A | G | C |
| 29858 #4          | A | A | G | A | C | G     | A     | U     | G | A | C | A | G | C |
| 29858 #5          | A | A | G | A | C | G     | A     | U     | G | A | C | A | G | C |
| 30668 #1          | A | A | G | A | C | G     | A     | U     | G | A | C | A | G | C |
| 30668 #2          | A | A | G | A | C | G     | A     | U     | G | A | C | A | G | C |
| 30668 #3          | A | A | G | A | C | G     | A     | U     | G | A | C | A | G | C |
| 30668 #4          | A | A | G | A | C | G     | A     | U     | G | A | C | A | G | C |
| 30668 #5          | A | A | G | A | C | G     | A     | U     | G | A | C | A | G | C |

**C**

| CHIKV LR2006-OPY1 | A | C | G | U | G | 10,166 | 10,173 | 10,175 | U | G | C | U | G | C |
|-------------------|---|---|---|---|---|--------|--------|--------|---|---|---|---|---|---|
| 25828 #1          | A | C | G | U | G | A      | A      | G      | U | G | C | U | G | C |
| 25828 #2          | A | C | G | U | G | A      | A      | G      | U | G | C | U | G | C |
| 25828 #3          | A | C | G | U | G | A      | A      | G      | U | G | C | U | G | C |
| 25828 #4          | A | C | G | U | G | A      | A      | G      | U | G | C | U | G | C |
| 25828 #5          | A | C | G | U | G | A      | A      | G      | U | G | C | U | G | C |
| 26638 #1          | A | C | G | U | G | A      | A      | G      | U | G | C | U | G | C |
| 26638 #2          | A | C | G | U | G | A      | A      | G      | U | G | C | U | G | C |
| 26638 #3          | A | C | G | U | G | A      | A      | G      | U | G | C | U | G | C |
| 26638 #4          | A | C | G | U | G | A      | A      | G      | U | G | C | U | G | C |
| 26638 #5          | A | C | G | U | G | A      | A      | G      | U | G | C | U | G | C |
| 29858 #1          | A | C | G | U | G | A      | A      | G      | U | G | C | U | G | C |
| 29858 #2          | A | C | G | U | G | A      | A      | G      | U | G | C | U | G | C |
| 29858 #3          | A | C | G | U | G | A      | A      | G      | U | G | C | U | G | C |
| 29858 #4          | A | C | G | U | G | A      | A      | G      | U | G | C | U | G | C |
| 29858 #5          | A | C | G | U | G | A      | A      | G      | U | G | C | U | G | C |
| 30668 #1          | A | C | G | U | G | A      | A      | G      | U | G | C | U | G | C |
| 30668 #2          | A | C | G | U | G | A      | A      | G      | U | G | C | U | G | C |
| 30668 #3          | A | C | G | U | G | A      | A      | G      | U | G | C | U | G | C |
| 30668 #4          | A | C | G | U | G | A      | A      | G      | U | G | C | U | G | C |
| 30668 #5          | A | C | G | U | G | A      | A      | G      | U | G | C | U | G | C |

**B**

| CHIKV LR2006-OPY1 | A | G | A | C | G | 8,716 | 8,718 | 8,720 | A | C | A | G | C |   |
|-------------------|---|---|---|---|---|-------|-------|-------|---|---|---|---|---|---|
| 30664 R. Quad #1  | A | G | A | C | G | G     | A     | U     | G | A | C | A | G | C |
| 30664 R. Quad #2  | A | G | A | C | G | G     | A     | U     | G | A | C | A | G | C |
| 30664 R. Quad #3  | A | G | A | C | G | G     | A     | U     | G | A | C | A | G | C |
| 30664 R. Quad #4  | A | G | A | C | G | G     | A     | U     | G | A | C | A | G | C |
| 30664 R. Quad #5  | A | G | A | C | G | G     | A     | U     | G | A | C | A | G | C |
| 29858 R. Toe #1   | A | G | A | C | G | G     | A     | U     | G | A | C | A | G | C |
| 29858 R. Toe #2   | A | G | A | C | G | G     | A     | U     | G | A | C | A | G | C |
| 29858 R. Toe #3   | A | G | A | C | G | G     | A     | U     | G | A | C | A | G | C |
| 29858 R. Toe #4   | A | G | A | C | G | G     | A     | U     | G | A | C | A | G | C |
| 29858 R. Toe #5   | A | G | A | C | G | G     | A     | U     | G | A | C | A | G | C |
| 30664 R. Toe #1   | A | G | A | C | G | G     | A     | U     | G | A | C | A | G | C |
| 30664 R. Toe #2   | A | G | A | C | G | G     | A     | U     | G | A | C | A | G | C |
| 30664 R. Toe #3   | A | G | A | C | G | G     | A     | U     | G | A | C | A | G | C |
| 30664 R. Toe #4   | A | G | A | C | G | G     | A     | U     | G | A | C | A | G | C |
| 30664 R. Toe #5   | A | G | A | C | G | G     | A     | U     | G | A | C | A | G | C |

**D**

| CHIKV LR2006-OPY1 | A | C | G | U | G | 10,170 | 10,174 | 10,176 | U | G | C | U | G | C |
|-------------------|---|---|---|---|---|--------|--------|--------|---|---|---|---|---|---|
| 30664 R. Quad #1  | A | C | G | U | G | A      | A      | G      | U | G | C | U | G | C |
| 30664 R. Quad #2  | A | C | G | U | G | A      | A      | G      | U | G | C | U | G | C |
| 30664 R. Quad #3  | A | C | G | U | G | A      | A      | G      | U | G | C | U | G | C |
| 30664 R. Quad #4  | A | C | G | U | G | A      | A      | G      | U | G | C | U | G | C |
| 30664 R. Quad #5  | A | C | G | U | G | A      | A      | G      | U | G | C | U | G | C |
| 29858 R. Toe #1   | A | C | G | U | G | A      | A      | G      | U | G | C | U | G | C |
| 29858 R. Toe #2   | A | C | G | U | G | A      | A      | G      | U | G | C | U | G | C |
| 29858 R. Toe #3   | A | C | G | U | G | A      | A      | G      | U | G | C | U | G | C |
| 29858 R. Toe #4   | A | C | G | U | G | A      | A      | G      | U | G | C | U | G | C |
| 29858 R. Toe #5   | A | C | G | U | G | A      | A      | G      | U | G | C | U | G | C |
| 30664 R. Toe #1   | A | C | G | U | G | A      | A      | G      | U | G | C | U | G | C |
| 30664 R. Toe #2   | A | C | G | U | G | A      | A      | G      | U | G | C | U | G | C |
| 30664 R. Toe #3   | A | C | G | U | G | A      | A      | G      | U | G | C | U | G | C |
| 30664 R. Toe #4   | A | C | G | U | G | A      | A      | G      | U | G | C | U | G | C |
| 30664 R. Toe #5   | A | C | G | U | G | A      | A      | G      | U | G | C | U | G | C |

Figure S1

**A**

|                          | 8,710 |   |   |   |   |   |   | 8,720 |   |   |   |   |   |   |   |   |   |   |
|--------------------------|-------|---|---|---|---|---|---|-------|---|---|---|---|---|---|---|---|---|---|
| CHIKV LR2006-OPY1        | U     | A | A | A | G | A | C | G     | G | A | U | G | A | C | A | G | C | C |
| CHIKV WT #1              | U     | A | A | A | G | A | C | G     | G | A | U | G | A | C | A | G | C | C |
| CHIKV WT #2              | U     | A | A | A | G | A | C | G     | G | A | U | G | A | C | A | G | C | C |
| CHIKV E2-D59N #1         | U     | A | A | A | G | A | C | G     | A | A | U | G | A | C | A | G | C | C |
| CHIKV E2-D59N #2         | U     | A | A | A | G | A | C | G     | A | A | U | G | A | C | A | G | C | C |
| CHIKV E2-D59N #3         | U     | A | A | A | G | A | C | G     | A | A | U | G | A | C | A | G | C | C |
| CHIKV E2-D59N E1-K61T #1 | U     | A | A | A | G | A | C | G     | A | A | U | G | A | C | A | G | C | C |
| CHIKV E2-D59N E1-K61T #2 | U     | A | A | A | G | A | C | G     | A | A | U | G | A | C | A | G | C | C |
| CHIKV E2-D59N E1-K61T #3 | U     | A | A | A | G | A | C | G     | A | A | U | G | A | C | A | G | C | C |
| CHIKV E1-K61T #1         | U     | A | A | A | G | A | C | G     | G | A | U | G | A | C | A | G | C | C |
| CHIKV E1-K61T #2         | U     | A | A | A | G | A | C | G     | G | A | U | G | A | C | A | G | C | C |
| CHIKV E1-K61T #3         | U     | A | A | A | G | A | C | G     | G | A | U | G | A | C | A | G | C | C |

**B**

|                          | 10,170 |   |   |   |   |   |   | 10,180 |   |   |   |   |   |   |   |   |   |   |
|--------------------------|--------|---|---|---|---|---|---|--------|---|---|---|---|---|---|---|---|---|---|
| CHIKV LR2006-OPY1        | G      | U | A | C | G | U | G | A      | A | G | U | G | C | U | G | C | G | G |
| CHIKV WT #1              | G      | U | A | C | G | U | G | A      | A | G | U | G | C | U | G | C | G | G |
| CHIKV WT #2              | G      | U | A | C | G | U | G | A      | A | G | U | G | C | U | G | C | G | G |
| CHIKV E2-D59N #1         | G      | U | A | C | G | U | G | A      | A | G | U | G | C | U | G | C | G | G |
| CHIKV E2-D59N #2         | G      | U | A | C | G | U | G | A      | A | G | U | G | C | U | G | C | G | G |
| CHIKV E2-D59N #3         | G      | U | A | C | G | U | G | A      | A | G | U | G | C | U | G | C | G | G |
| CHIKV E2-D59N E1-K61T #1 | G      | U | A | C | G | U | G | A      | C | G | U | G | C | U | G | C | G | G |
| CHIKV E2-D59N E1-K61T #2 | G      | U | A | C | G | U | G | A      | C | G | U | G | C | U | G | C | G | G |
| CHIKV E2-D59N E1-K61T #3 | G      | U | A | C | G | U | G | A      | C | G | U | G | C | U | G | C | G | G |
| CHIKV E1-K61T #1         | G      | U | A | C | G | U | G | A      | C | G | U | G | C | U | G | C | G | G |
| CHIKV E1-K61T #2         | G      | U | A | C | G | U | G | A      | C | G | U | G | C | U | G | C | G | G |
| CHIKV E1-K61T #3         | G      | U | A | C | G | U | G | A      | C | G | U | G | C | U | G | C | G | G |

**Figure S2**

**A**

|                          | 9,710 |   |   |   |   |   |   |   |   |   | 9,720 |   |   |   |   |   |   |   |
|--------------------------|-------|---|---|---|---|---|---|---|---|---|-------|---|---|---|---|---|---|---|
| CHIKV LR2006-OPY1        | U     | A | A | A | G | A | C | G | G | A | U     | G | A | C | A | G | C | C |
| CHIKV WT #1              | U     | A | A | A | G | A | C | G | G | A | U     | G | A | C | A | G | C | C |
| CHIKV WT #2              | U     | A | A | A | G | A | C | G | G | A | U     | G | A | C | A | G | C | C |
| CHIKV E2-D59N #1         | U     | A | A | A | G | A | C | G | A | A | U     | G | A | C | A | G | C | C |
| CHIKV E2-D59N #2         | U     | A | A | A | G | A | C | G | A | A | U     | G | A | C | A | G | C | C |
| CHIKV E2-D59N #3         | U     | A | A | A | G | A | C | G | A | A | U     | G | A | C | A | G | C | C |
| CHIKV E2-D59N E1-K61T #1 | U     | A | A | A | G | A | C | G | A | A | U     | G | A | C | A | G | C | C |
| CHIKV E2-D59N E1-K61T #2 | U     | A | A | A | G | A | C | G | A | A | U     | G | A | C | A | G | C | C |
| CHIKV E2-D59N E1-K61T #3 | U     | A | A | A | G | A | C | G | A | A | U     | G | A | C | A | G | C | C |
| CHIKV E1-K61T #1         | U     | A | A | A | G | A | C | G | G | A | U     | G | A | C | A | G | C | C |
| CHIKV E1-K61T #2         | U     | A | A | A | G | A | C | G | G | A | U     | G | A | C | A | G | C | C |
| CHIKV E1-K61T #3         | U     | A | A | A | G | A | C | G | G | A | U     | G | A | C | A | G | C | C |

**B**

|                          | 10,170 |   |   |   |   |   |   |   |   |   | 10,180 |   |   |   |   |   |   |   |
|--------------------------|--------|---|---|---|---|---|---|---|---|---|--------|---|---|---|---|---|---|---|
| CHIKV LR2006-OPY1        | G      | U | A | C | G | U | G | A | A | G | U      | G | C | U | G | C | G | G |
| CHIKV WT #1              | G      | U | A | C | G | U | G | A | A | G | U      | G | C | U | G | C | G | G |
| CHIKV WT #2              | G      | U | A | C | G | U | G | A | A | G | U      | G | C | U | G | C | G | G |
| CHIKV E2-D59N #1         | G      | U | A | C | G | U | G | A | A | G | U      | G | C | U | G | C | G | G |
| CHIKV E2-D59N #2         | G      | U | A | C | G | U | G | A | A | G | U      | G | C | U | G | C | G | G |
| CHIKV E2-D59N #3         | G      | U | A | C | G | U | G | A | A | G | U      | G | C | U | G | C | G | G |
| CHIKV E2-D59N E1-K61T #1 | G      | U | A | C | G | U | G | A | C | G | U      | G | C | U | G | C | G | G |
| CHIKV E2-D59N E1-K61T #2 | G      | U | A | C | G | U | G | A | C | G | U      | G | C | U | G | C | G | G |
| CHIKV E2-D59N E1-K61T #3 | G      | U | A | C | G | U | G | A | C | G | U      | G | C | U | G | C | G | G |
| CHIKV E1-K61T #1         | G      | U | A | C | G | U | G | A | C | G | U      | G | C | U | G | C | G | G |
| CHIKV E1-K61T #2         | G      | U | A | C | G | U | G | A | C | G | U      | G | C | U | G | C | G | G |
| CHIKV E1-K61T #3         | G      | U | A | C | G | U | G | A | C | G | U      | G | C | U | G | C | G | G |

**Figure S3**

**A**

|                          | 8,710 |   |   |   |   |   |   |   | 8,720 |   |   |   |   |   |   |   |   |   |
|--------------------------|-------|---|---|---|---|---|---|---|-------|---|---|---|---|---|---|---|---|---|
| CHIKV LR2006-OPY1        | U     | A | A | A | G | A | C | G | G     | A | U | G | A | C | A | G | C | C |
| CHIKV E2-D59N #1         | U     | A | A | A | G | A | C | G | A     | A | U | G | A | C | A | G | C | C |
| CHIKV E2-D59N #2         | U     | A | A | A | G | A | C | G | A     | A | U | G | A | C | A | G | C | C |
| CHIKV E2-D59N #3         | U     | A | A | A | G | A | C | G | A     | A | U | G | A | C | A | G | C | C |
| CHIKV E2-D59N #4         | U     | A | A | A | G | A | C | G | A     | A | U | G | A | C | A | G | C | C |
| CHIKV E2-D59N E1-K61T #1 | U     | A | A | A | G | A | C | G | A     | A | U | G | A | C | A | G | C | C |
| CHIKV E2-D59N E1-K61T #2 | U     | A | A | A | G | A | C | G | A     | A | U | G | A | C | A | G | C | C |
| CHIKV E2-D59N E1-K61T #3 | U     | A | A | A | G | A | C | G | A     | A | U | G | A | C | A | G | C | C |
| CHIKV E1-K61T #1         | U     | A | A | A | G | A | C | G | G     | A | U | G | A | C | A | G | C | C |
| CHIKV E1-K61T #2         | U     | A | A | A | G | A | C | G | G     | A | U | G | A | C | A | G | C | C |
| CHIKV E1-K61T #3         | U     | A | A | A | G | A | C | G | G     | A | U | G | A | C | A | G | C | C |
| CHIKV E1-K61T #4         | U     | A | A | A | G | A | C | G | G     | A | U | G | A | C | A | G | C | C |

**B**

|                          | 10,170 |   |   |   |   |   |   |   | 10,180 |   |   |   |   |   |   |   |   |   |
|--------------------------|--------|---|---|---|---|---|---|---|--------|---|---|---|---|---|---|---|---|---|
| CHIKV LR2006-OPY1        | G      | U | A | C | G | U | G | A | A      | G | U | G | C | U | G | C | G | G |
| CHIKV E2-D59N #1         | G      | U | A | C | G | U | G | A | A      | G | U | G | C | U | G | C | G | G |
| CHIKV E2-D59N #2         | G      | U | A | C | G | U | G | A | A      | G | U | G | C | U | G | C | G | G |
| CHIKV E2-D59N #3         | G      | U | A | C | G | U | G | A | A      | G | U | G | C | U | G | C | G | G |
| CHIKV E2-D59N #4         | G      | U | A | C | G | U | G | A | A      | G | U | G | C | U | G | C | G | G |
| CHIKV E2-D59N E1-K61T #1 | G      | U | A | C | G | U | G | A | C      | G | U | G | C | U | G | C | G | G |
| CHIKV E2-D59N E1-K61T #2 | G      | U | A | C | G | U | G | A | C      | G | U | G | C | U | G | C | G | G |
| CHIKV E2-D59N E1-K61T #3 | G      | U | A | C | G | U | G | A | C      | G | U | G | C | U | G | C | G | G |
| CHIKV E1-K61T #1         | G      | U | A | C | G | U | G | A | C      | G | U | G | C | U | G | C | G | G |
| CHIKV E1-K61T #2         | G      | U | A | C | G | U | G | A | C      | G | U | G | C | U | G | C | G | G |
| CHIKV E1-K61T #3         | G      | U | A | C | G | U | G | A | C      | G | U | G | C | U | G | C | G | G |
| CHIKV E1-K61T #4         | G      | U | A | C | G | U | G | A | C      | G | U | G | C | U | G | C | G | G |

**Figure S4**

**A**

|                                            | 8,710 |   |   |   |   |   |   |   |   |   | 8,720 |   |   |   |   |   |   |   |  |  |
|--------------------------------------------|-------|---|---|---|---|---|---|---|---|---|-------|---|---|---|---|---|---|---|--|--|
| CHIKV LR2006-OPY1                          | U     | A | A | A | G | A | C | G | G | A | U     | G | A | C | A | G | C | C |  |  |
| CHIKV WT                                   | U     | A | A | A | G | A | C | G | G | A | U     | G | A | C | A | G | C | C |  |  |
| CHIKV E2-D59N #1                           | U     | A | A | A | G | A | C | G | A | A | U     | G | A | C | A | G | C | C |  |  |
| CHIKV E2-D59N #2                           | U     | A | A | A | G | A | C | G | A | A | U     | G | A | C | A | G | C | C |  |  |
| CHIKV E2-D59N #3                           | U     | A | A | A | G | A | C | G | A | A | U     | G | A | C | A | G | C | C |  |  |
| CHIKV E2-D59N + CHK-152 #1                 | U     | A | A | A | G | A | C | G | A | A | U     | G | A | C | A | G | C | C |  |  |
| CHIKV E2-D59N + CHK-152 #2                 | U     | A | A | A | G | A | C | G | A | A | U     | G | A | C | A | G | C | C |  |  |
| CHIKV E2-D59N + CHK-152 #3                 | U     | A | A | A | G | A | C | G | A | A | U     | G | A | C | A | G | C | C |  |  |
| CHIKV E2-D59N E1-K61T #1                   | U     | A | A | A | G | A | C | G | A | A | U     | G | A | C | A | G | C | C |  |  |
| CHIKV E2-D59N E1-K61T #2                   | U     | A | A | A | G | A | C | G | A | A | U     | G | A | C | A | G | C | C |  |  |
| CHIKV E2-D59N E1-K61T #3                   | U     | A | A | A | G | A | C | G | A | A | U     | G | A | C | A | G | C | C |  |  |
| CHIKV E2-D59N E1-K61T + CHK-152/CHK-166 #1 | U     | A | A | A | G | A | C | G | A | A | U     | G | A | C | A | G | C | C |  |  |
| CHIKV E2-D59N E1-K61T + CHK-152/CHK-166 #2 | U     | A | A | A | G | A | C | G | A | A | U     | G | A | C | A | G | C | C |  |  |
| CHIKV E1-K61T #1                           | U     | A | A | A | G | A | C | G | G | A | U     | G | A | C | A | G | C | C |  |  |
| CHIKV E1-K61T #2                           | U     | A | A | A | G | A | C | G | G | A | U     | G | A | C | A | G | C | C |  |  |
| CHIKV E1-K61T #3                           | U     | A | A | A | G | A | C | G | G | A | U     | G | A | C | A | G | C | C |  |  |
| CHIKV E1-K61T + CHK-166 #1                 | U     | A | A | A | G | A | C | G | G | A | U     | G | A | C | A | G | C | C |  |  |
| CHIKV E1-K61T + CHK-166 #2                 | U     | A | A | A | G | A | C | G | G | A | U     | G | A | C | A | G | C | C |  |  |
| CHIKV E1-K61T + CHK-166 #3                 | U     | A | A | A | G | A | C | G | G | A | U     | G | A | C | A | G | C | C |  |  |

**B**

|                                            | 10,170 |   |   |   |   |   |   |   |   |   | 10,180 |   |   |   |   |   |   |   |  |  |
|--------------------------------------------|--------|---|---|---|---|---|---|---|---|---|--------|---|---|---|---|---|---|---|--|--|
| CHIKV LR2006-OPY1                          | G      | U | A | C | G | U | G | A | A | G | U      | G | C | U | G | C | G | G |  |  |
| CHIKV WT                                   | G      | U | A | C | G | U | G | A | A | G | U      | G | C | U | G | C | G | G |  |  |
| CHIKV E2-D59N #1                           | G      | U | A | C | G | U | G | A | A | G | U      | G | C | U | G | C | G | G |  |  |
| CHIKV E2-D59N #2                           | G      | U | A | C | G | U | G | A | A | G | U      | G | C | U | G | C | G | G |  |  |
| CHIKV E2-D59N #3                           | G      | U | A | C | G | U | G | A | A | G | U      | G | C | U | G | C | G | G |  |  |
| CHIKV E2-D59N + CHK-152 #1                 | G      | U | A | C | G | U | G | A | A | G | U      | G | C | U | G | C | G | G |  |  |
| CHIKV E2-D59N + CHK-152 #2                 | G      | U | A | C | G | U | G | A | A | G | U      | G | C | U | G | C | G | G |  |  |
| CHIKV E2-D59N + CHK-152 #3                 | G      | U | A | C | G | U | G | A | A | G | U      | G | C | U | G | C | G | G |  |  |
| CHIKV E2-D59N E1-K61T #1                   | G      | U | A | C | G | U | G | A | C | G | U      | G | C | U | G | C | G | G |  |  |
| CHIKV E2-D59N E1-K61T #2                   | G      | U | A | C | G | U | G | A | C | G | U      | G | C | U | G | C | G | G |  |  |
| CHIKV E2-D59N E1-K61T #3                   | G      | U | A | C | G | U | G | A | C | G | U      | G | C | U | G | C | G | G |  |  |
| CHIKV E2-D59N E1-K61T + CHK-152/CHK-166 #1 | G      | U | A | C | G | U | G | A | C | G | U      | G | C | U | G | C | G | G |  |  |
| CHIKV E2-D59N E1-K61T + CHK-152/CHK-166 #2 | G      | U | A | C | G | U | G | A | C | G | U      | G | C | U | G | C | G | G |  |  |
| CHIKV E1-K61T #1                           | G      | U | A | C | G | U | G | A | C | G | U      | G | C | U | G | C | G | G |  |  |
| CHIKV E1-K61T #2                           | G      | U | A | C | G | U | G | A | C | G | U      | G | C | U | G | C | G | G |  |  |
| CHIKV E1-K61T #3                           | G      | U | A | C | G | U | G | A | C | G | U      | G | C | U | G | C | G | G |  |  |
| CHIKV E1-K61T + CHK-166 #1                 | G      | U | A | C | G | U | G | A | C | G | U      | G | C | U | G | C | G | G |  |  |
| CHIKV E1-K61T + CHK-166 #2                 | G      | U | A | C | G | U | G | A | C | G | U      | G | C | U | G | C | G | G |  |  |
| CHIKV E1-K61T + CHK-166 #3                 | G      | U | A | C | G | U | G | A | C | G | U      | G | C | U | G | C | G | G |  |  |

**Figure S5**

**A**

|                          | 8,710 |   |   |   |   |   |   |   |   |   | 8,720 |   |   |   |   |   |   |   |
|--------------------------|-------|---|---|---|---|---|---|---|---|---|-------|---|---|---|---|---|---|---|
| CHIKV LR2006-OPY1        | U     | A | A | A | G | A | C | G | G | A | U     | G | A | C | A | G | C | C |
| CHIKV WT #1              | U     | A | A | A | G | A | C | G | G | A | U     | G | A | C | A | G | C | C |
| CHIKV WT #2              | U     | A | A | A | G | A | C | G | G | A | U     | G | A | C | A | G | C | C |
| CHIKV E2-D59N E1-K61T #1 | U     | A | A | A | G | A | C | G | A | A | U     | G | A | C | A | G | C | C |
| CHIKV E2-D59N E1-K61T #2 | U     | A | A | A | G | A | C | G | A | A | U     | G | A | C | A | G | C | C |
| CHIKV E2-D59N E1-K61T #3 | U     | A | A | A | G | A | C | G | A | A | U     | G | A | C | A | G | C | C |
| CHIKV E2-D59N E1-K61T #4 | U     | A | A | A | G | A | C | G | A | A | U     | G | A | C | A | G | C | C |

**B**

|                          | 10,170 |   |   |   |   |   |   |   |   |   | 10,180 |   |   |   |   |   |   |   |
|--------------------------|--------|---|---|---|---|---|---|---|---|---|--------|---|---|---|---|---|---|---|
| CHIKV LR2006-OPY1        | G      | U | A | C | G | U | G | A | A | G | U      | G | C | U | G | C | G | G |
| CHIKV WT #1              | G      | U | A | C | G | U | G | A | A | G | U      | G | C | U | G | C | G | G |
| CHIKV WT #2              | G      | U | A | C | G | U | G | A | A | G | U      | G | C | U | G | C | G | G |
| CHIKV E2-D59N E1-K61T #1 | G      | U | A | C | G | U | G | A | C | G | U      | G | C | U | G | C | G | G |
| CHIKV E2-D59N E1-K61T #2 | G      | U | A | C | G | U | G | A | C | G | U      | G | C | U | G | C | G | G |
| CHIKV E2-D59N E1-K61T #3 | G      | U | A | C | G | U | G | A | C | G | U      | G | C | U | G | C | G | G |
| CHIKV E2-D59N E1-K61T #4 | G      | U | A | C | G | U | G | A | C | G | U      | G | C | U | G | C | G | G |

**Figure S6**

**A**

|                          | 8,710 |   |   |   |   |   |   |   |          |   | 8,720 |   |   |          |   |   |   |   |
|--------------------------|-------|---|---|---|---|---|---|---|----------|---|-------|---|---|----------|---|---|---|---|
| CHIKV LR2006-OPY1        | U     | A | A | A | G | A | C | G | G        | A | U     | G | A | C        | A | G | C | C |
| CHIKV WT #1              | U     | A | A | A | G | A | C | G | G        | A | U     | G | A | <b>Y</b> | A | G | C | C |
| CHIKV WT #2              | U     | A | A | A | G | A | C | G | G        | A | U     | G | A | A        | G | C | C | C |
| CHIKV WT #3              | U     | A | A | A | G | A | C | G | G        | A | U     | G | A | C        | A | G | C | C |
| CHIKV WT #4              | U     | A | A | A | G | A | C | G | G        | A | U     | G | A | C        | A | G | C | C |
| CHIKV E2-D59N #1         | U     | A | A | A | G | A | C | G | <b>A</b> | A | U     | G | A | C        | A | G | C | C |
| CHIKV E2-D59N #2         | U     | A | A | A | G | A | C | G | <b>A</b> | A | U     | G | A | C        | A | G | C | C |
| CHIKV E2-D59N #3         | U     | A | A | A | G | A | C | G | <b>A</b> | A | U     | G | A | C        | A | G | C | C |
| CHIKV E2-D59N #4         | U     | A | A | A | G | A | C | G | <b>A</b> | A | U     | G | A | C        | A | G | C | C |
| CHIKV E2-D59N E1-K61T #1 | U     | A | A | A | G | A | C | G | <b>A</b> | A | U     | G | A | C        | A | G | C | C |
| CHIKV E2-D59N E1-K61T #2 | U     | A | A | A | G | A | C | G | <b>A</b> | A | U     | G | A | C        | A | G | C | C |
| CHIKV E2-D59N E1-K61T #3 | U     | A | A | A | G | A | C | G | <b>A</b> | A | U     | G | A | C        | A | G | C | C |
| CHIKV E2-D59N E1-K61T #4 | U     | A | A | A | G | A | C | G | <b>A</b> | A | U     | G | A | C        | A | G | C | C |
| CHIKV E1-K61T #1         | U     | A | A | A | G | A | C | G | G        | A | U     | G | A | C        | A | G | C | C |
| CHIKV E1-K61T #2         | U     | A | A | A | G | A | C | G | G        | A | U     | G | A | C        | A | G | C | C |
| CHIKV E1-K61T #3         | U     | A | A | A | G | A | C | G | G        | A | U     | G | A | C        | A | G | C | C |
| CHIKV E1-K61T #4         | U     | A | A | A | G | A | C | G | G        | A | U     | G | A | C        | A | G | C | C |

**B**

|                          | 10,160 |   |   |   |          |   |   |   |          |          | 10,170 |   |   |   |   |          |   |   |
|--------------------------|--------|---|---|---|----------|---|---|---|----------|----------|--------|---|---|---|---|----------|---|---|
| CHIKV LR2006-OPY1        | G      | U | A | C | G        | U | G | A | A        | G        | U      | G | C | U | G | C        | G | G |
| CHIKV WT #1              | G      | U | A | C | G        | U | G | A | A        | <b>R</b> | U      | G | C | U | G | C        | G | G |
| CHIKV WT #2              | G      | U | A | C | G        | U | G | A | A        | G        | U      | G | C | U | G | C        | G | G |
| CHIKV WT #3              | G      | U | A | C | G        | U | G | A | A        | G        | U      | G | C | U | G | C        | G | G |
| CHIKV WT #4              | G      | U | A | C | G        | U | G | A | A        | G        | U      | G | C | U | G | C        | G | G |
| CHIKV E2-D59N #1         | G      | U | A | C | G        | U | G | A | A        | G        | U      | G | C | U | G | C        | G | G |
| CHIKV E2-D59N #2         | G      | U | A | C | G        | U | G | A | A        | G        | U      | G | C | U | G | C        | G | G |
| CHIKV E2-D59N #3         | G      | U | A | C | G        | U | G | A | A        | G        | U      | G | C | U | G | C        | G | G |
| CHIKV E2-D59N #4         | G      | U | A | C | G        | U | G | A | A        | G        | U      | G | C | U | G | <b>S</b> | G | G |
| CHIKV E2-D59N E1-K61T #1 | G      | U | A | C | G        | U | G | A | <b>C</b> | G        | U      | G | C | U | G | C        | G | G |
| CHIKV E2-D59N E1-K61T #2 | G      | U | A | C | G        | U | G | A | <b>C</b> | G        | U      | G | C | U | G | C        | G | G |
| CHIKV E2-D59N E1-K61T #3 | G      | U | A | C | G        | U | G | A | <b>C</b> | G        | U      | G | C | U | G | C        | G | G |
| CHIKV E2-D59N E1-K61T #4 | G      | U | A | C | G        | U | G | A | <b>C</b> | G        | U      | G | C | U | G | C        | G | G |
| CHIKV E1-K61T #1         | G      | U | A | C | <b>S</b> | U | G | A | <b>C</b> | G        | U      | G | C | U | G | C        | G | G |
| CHIKV E1-K61T #2         | G      | U | A | C | G        | U | G | A | <b>C</b> | G        | U      | G | C | U | G | C        | G | G |
| CHIKV E1-K61T #3         | G      | U | A | C | G        | U | G | A | <b>C</b> | G        | U      | G | C | U | G | C        | G | G |
| CHIKV E1-K61T #4         | G      | U | A | C | G        | U | G | A | <b>C</b> | G        | U      | G | C | U | G | C        | G | G |

**Figure S7**

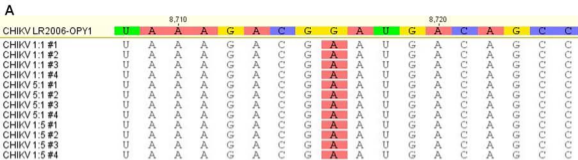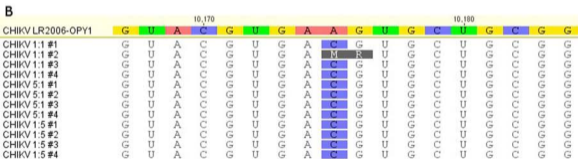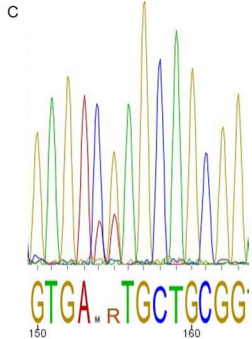

**Figure S8**
